# Supplementary material
Source: publisher figshare collection journal article supplement (https://tandf.figshare.com/ndownloader/files/29027900)
Supplement: Supplementary file 1 [file 29027900]

Supplementary table S1. Diversity and frequency of the occurring family activities: descriptive statistics and domain level group differences

| Family activities | Diversitya | |  | Mean proportionb | | *r*c |  | Frequencyd | | *r*c |
| --- | --- | --- | --- | --- | --- | --- | --- | --- | --- | --- |
| CP | TD | CP | TD | CP | TD |
| Indoor activities | 12.69 (2.36) | 13.43 (1.40) |  | 0.79 | 0.90* | 0.31 |  | 3.50 (0.23) | 3.39 (0.24) |  |
| Meals | 7.10 (1.40) | 7.38 (1.04) |  | 0.89 | 0.92 |  |  | 3.72 (0.30)* | 3.43 (0.39) | 0.41 |
| Routines | 6.81 (1.41) | 7.26 (0.78) |  | 0.85 | 0.91 |  |  | 3.65 (0.24) | 3.62 (0.22) |  |
| Outdoor activities | 6.27 (1.92) | 7.16 (1.51) |  | 0.70 | 0.80* | 0.24 |  | 3.06 (0.60) | 3.18 (0.38) |  |
| Organized activities | 2.08 (1.15) | 2.15 (1.27) |  | 0.52 | 0.43 |  |  | 2.56 (0.96) | 2.94 (1.11)* | 0.25 |
| Outings | 5.71 (1.97) | 7.70 (1.30) |  | 0.63 | 0.86* | 0.53 |  | 3.01 (0.71) | 3.30 (0.37)* | 0.20 |
| Vacation | 1.00 (0.80) | 1.58 (0.60) |  | 0.50 | 0.79* | 0.37 |  | 1.65 (1.25) | 2.81 (0.94)* | 0.49 |

CP: group of children with cerebral palsy (*n* = 48); TD: group of children with typical development (*n* = 74).

aNumber of occurring family activities, given as *M* (*SD*) for descriptive purposes. Theoretical maximum: Indoor activities = 16/15 (CP/TD); Meals = 8, Routines = 8, Outdoor activities = 9, Organized activities = 4/5 (CP/TD); Outings= 9; Vacation = 2 activities.

bFor the purpose of comparison, diversity score is converted to a proportion. Higher scores indicate greater diversity (range = 0–1).

cComparison using Mann-Whitney *U* test. Effect size (*r*) is calculated by dividing the Z‐statistic by √N, reported as an absolute value and displayed only in case of a statistically significant between‐group difference.

dFrequency of the occurring family activities, given as *M* (*SD*). Higher scores indicate a higher frequency (1 = *never/hardly ever*, 2 = *monthly*, 3 = *weekly*, 4 = *daily*).

*The asterisk is placed with the group that reported significantly higher scores (*p* < 0.05).

Supplementary table S2. Child presence and engagement in family activities: descriptive statistics and domain level group differences

| Family activities | Child presencea | | *r*b | Child engagementc | | *r*b |
| --- | --- | --- | --- | --- | --- | --- |
| CP | TD | CP | TD |
| Indoor activities | 96.62 (9.70) | 97.62 (5.50) |  | 3.15 (0.59) | 3.67 (0.44)* | 0.49 |
| Meals | 78.83 (20.89) | 90.17 (14.18)* | 0.25 | 2.66 (0.87) | 3.20 (0.61)* | 0.33 |
| Routines | 79.09 (21.11) | 93.12 (13.04)* | 0.36 | 2.85 (0.73) | 3.45 (0.44)* | 0.45 |
| Outdoor activities | 87.26 (19.27) | 96.65 (6.93)* | 0.30 | 2.96 (0.82) | 3.60 (0.45)* | 0.42 |
| Organized activities | 90.10 (29.51) | 90.54 (29.47) |  | 2.82 (0.86) | 3.51 (0.62)* | 0.43 |
| Outings | 94.17 (16.41) | 97.94 (6.38) |  | 2.96 (0.79) | 3.59 (0.52)* | 0.42 |
| Vacation | 67.71 (46.69) | 90.54 (29.47)* | 0.29 | 3.27 (0.77) | 3.76 (0.49)* | 0.36 |

CP: group of children with cerebral palsy (*n* = 48); TD: group of children with typical development (*n* = 74).

aAn indicator of the presence of a child in the occurring family activities, given as *M* (*SD*). Higher scores indicate a greater percentage of occurring family activities that the child is present in (range = 0–100%).

bComparison using Mann-Whitney *U* test. Effect size (*r*) is calculated by dividing the Z‐statistic by √N, reported as an absolute value and displayed only in case of a statistically significant between‐group difference.

cLevel of a child’s engagement in the occurring family activities, given as *M* (*SD*). Higher scores indicate greater engagement across occurring family activities (1 = *not at all*, 2 = *somewhat*, 3 = *rather much*, 4 = *much*).

*The asterisk is placed with the group that reported significantly higher scores (*p* < 0.05).
